# Supplementary material for: Finishing the finished human chromosome 22 sequence
Source: PubMed Central journal article supplement (PMC2441464; doi:10.1186/gb-2008-9-5-r78), 2008-05-13
Supplement: gb-2008-9-5-r78-S7.pdf [file gb-2008-9-5-r78-S7.pdf]

# Figure S1

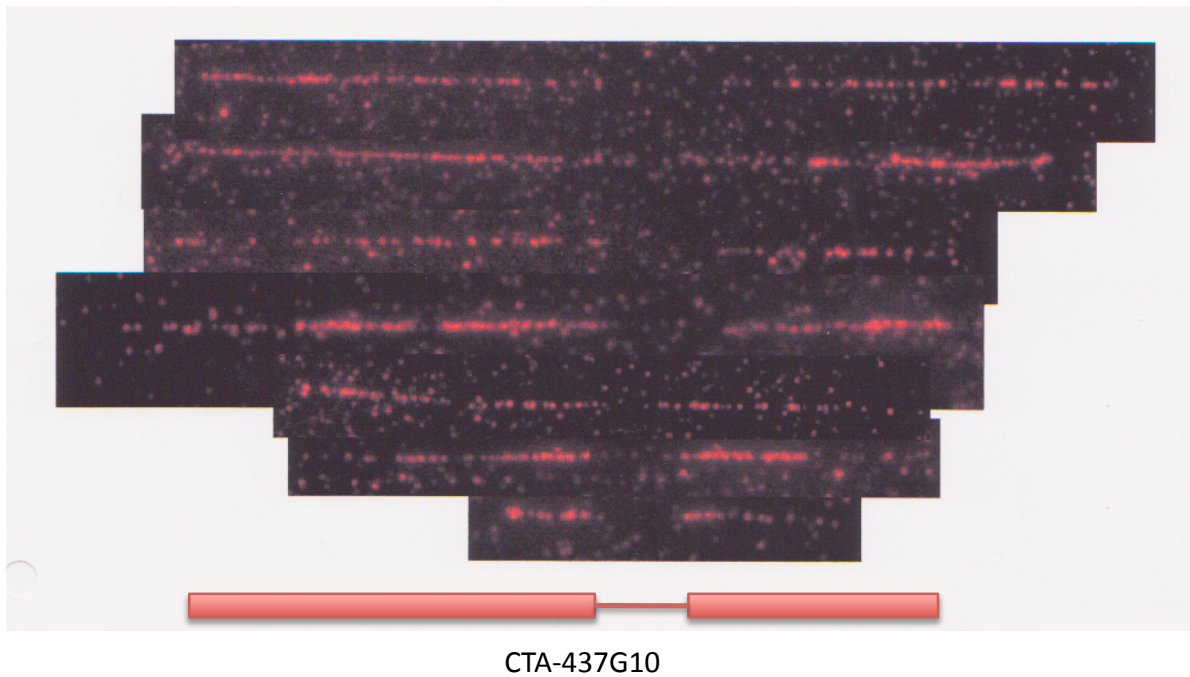

## Figure S1

A deletion in BAC CTA-437G10 (AL022330) established by DNA fibre FISH analysis. The top panel shows 7 example DNA fibres from the lymphoblastoid cell line HRC575 (ECACC) hybridised with BAC CTA-437G10 and detected in red (Texas Red). Below the red boxes indicate a summary interpretation of the fibre results indicating a deletion in the BAC compared to the genomic DNA.

# Figure S2

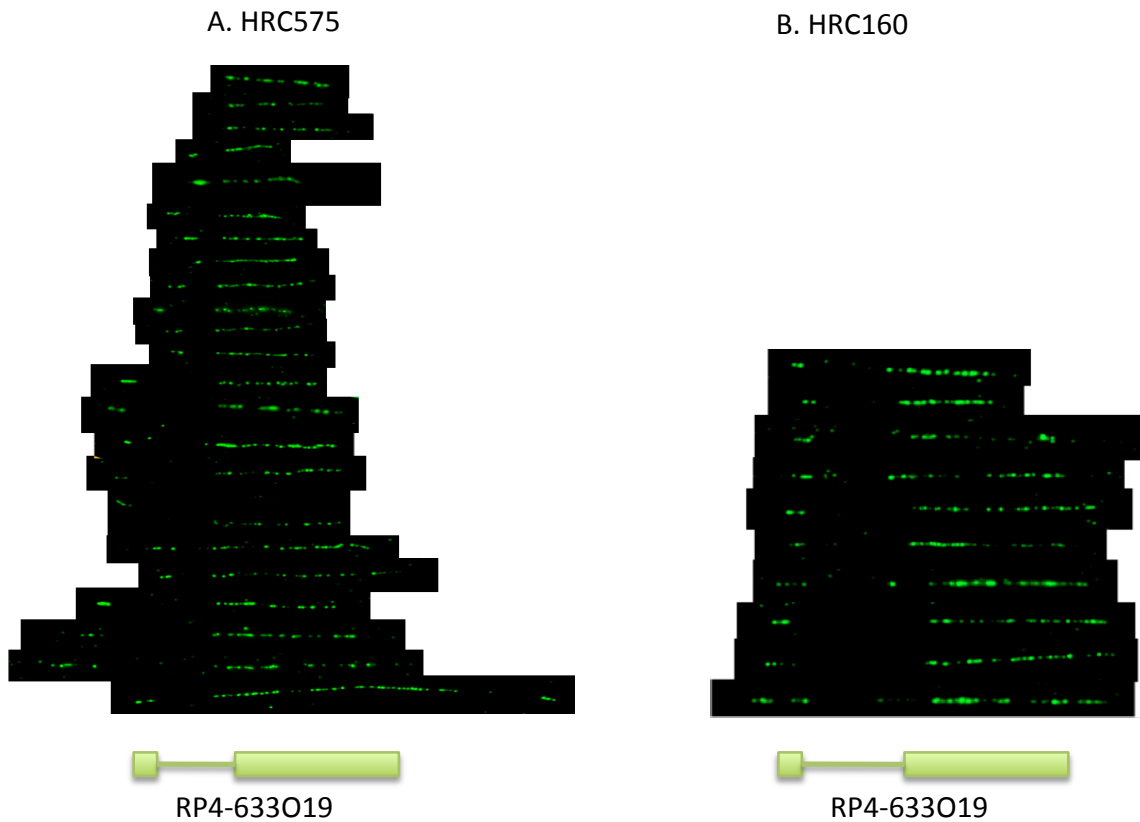

## Figure S2

Deletion in PAC RP4-633O19 (AL022302) identified by fosmid end mapping, confirmed by DNA fibre FISH analysis. The top panels show multiple DNA fibres hybridised with PAC RP4-633O19 and detected in green (FITC). Genomic DNA fibres were generated from lymphoblastoid cell lines from two different individuals, HRC575 (A) and HRC160 (B). Beneath the fibres, the green boxes represent a summary interpretation of the fibre results indicating a deletion in the PAC compared to the genomic DNA.

# Figure S3

A. HRC575

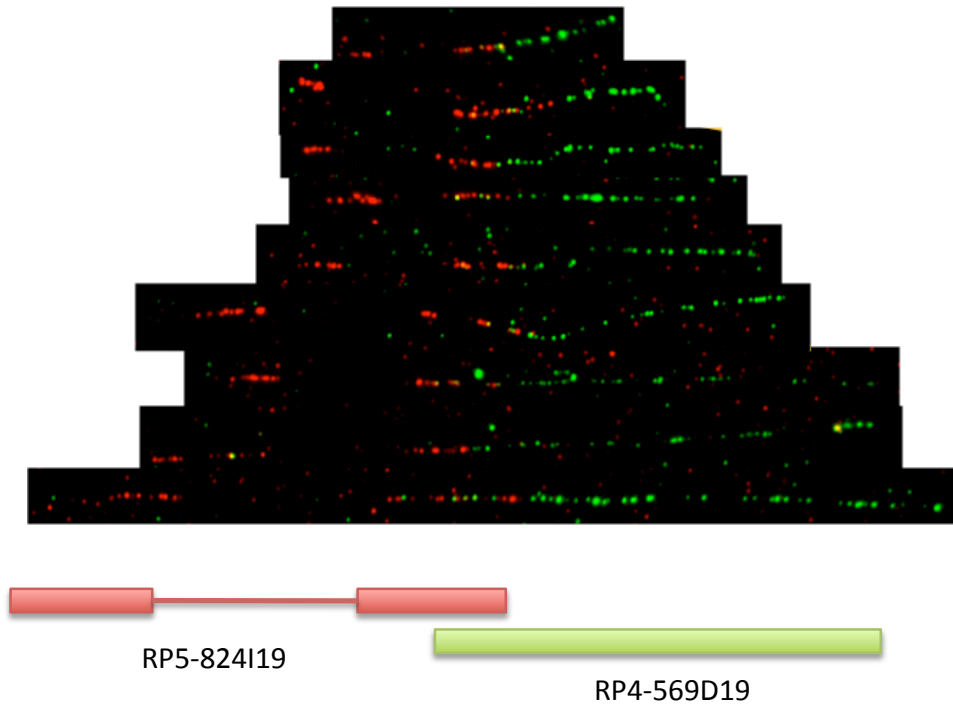

B. HRC160

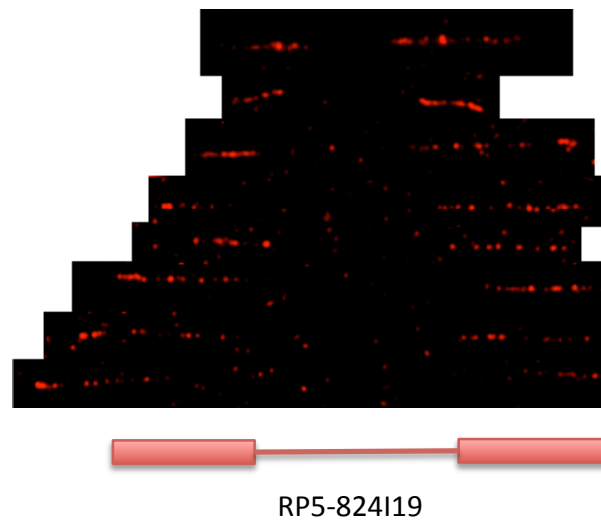

## Figure S3

Deletion in RP5-824I19 (AL009049) identified by fosmid end mapping, confirmed by DNA fibre FISH analysis. A. The top panel shows multiple HRC575 genomic DNA fibres hybridised with PAC RP5-824I19 (detected in red (Texas Red)) and the neighbouring overlapping PAC RP4-569D19 (detected in green (FITC)). Beneath the fibres, the red boxes represent a summary interpretation of the fibre results indicating a deletion in the PAC compared to the genomic DNA, together with the green box indicating the overlap with PAC RP4-569D19. B. A DNA fibre FISH experiment using PAC RP5-824I19 (detected in red (Texas Red)) on HRC160 lymphoblastoid cell line DNA fibres, indicating that the deletion is common across the four haplotypes (two individuals) tested.

# Figure S4 - Gap 1

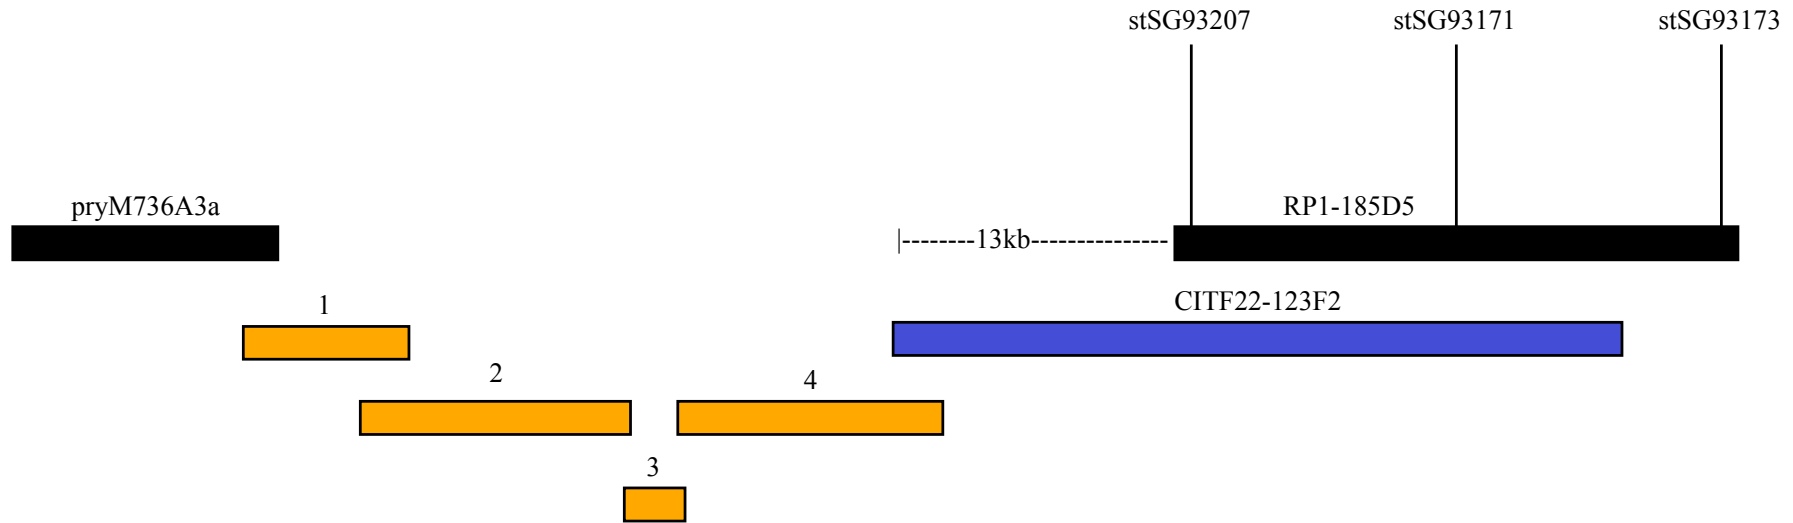

## Clones

|              |       |
|--------------|-------|
| pryM736A3a   | 10 kb |
| CITF22-123F2 | 38 kb |
| RP1-185D5    | 24 kb |

## Long PCR Products

|    |              |        |
|----|--------------|--------|
| 1. | c005500511   | 7 kb   |
| 2. | c0511c0695L  | 13 kb  |
| 3. | c008600695rc | 2.5 kb |
| 4. | FW80414D10I  | 10 kb  |

|                                                                                       |                                   |
|---------------------------------------------------------------------------------------|-----------------------------------|
|    | Original sequence clone           |
|    | Chromosome walking and fibre FISH |
|    | Long PCR                          |
|  | Chimpanzee WGS                    |

## Figures S4-S13

Schematic views of mapping paths used to identify clones and PCR products for sequencing for 10 of the gaps as indicated. Clones and long PCR products are indicated by coloured boxes approximately to scale and shown by type according to the legend and table within each figure. Additional sources of sequence used for design of mapping reagents beyond the chromosome 22 WCS are also indicated according to the key. The figures S4-S13 should be read in conjunction with Tables S3 and S4 which list the mapping and long PCR STSs and the sources of sequence used for their design.

# Figure S5 - Gap 2

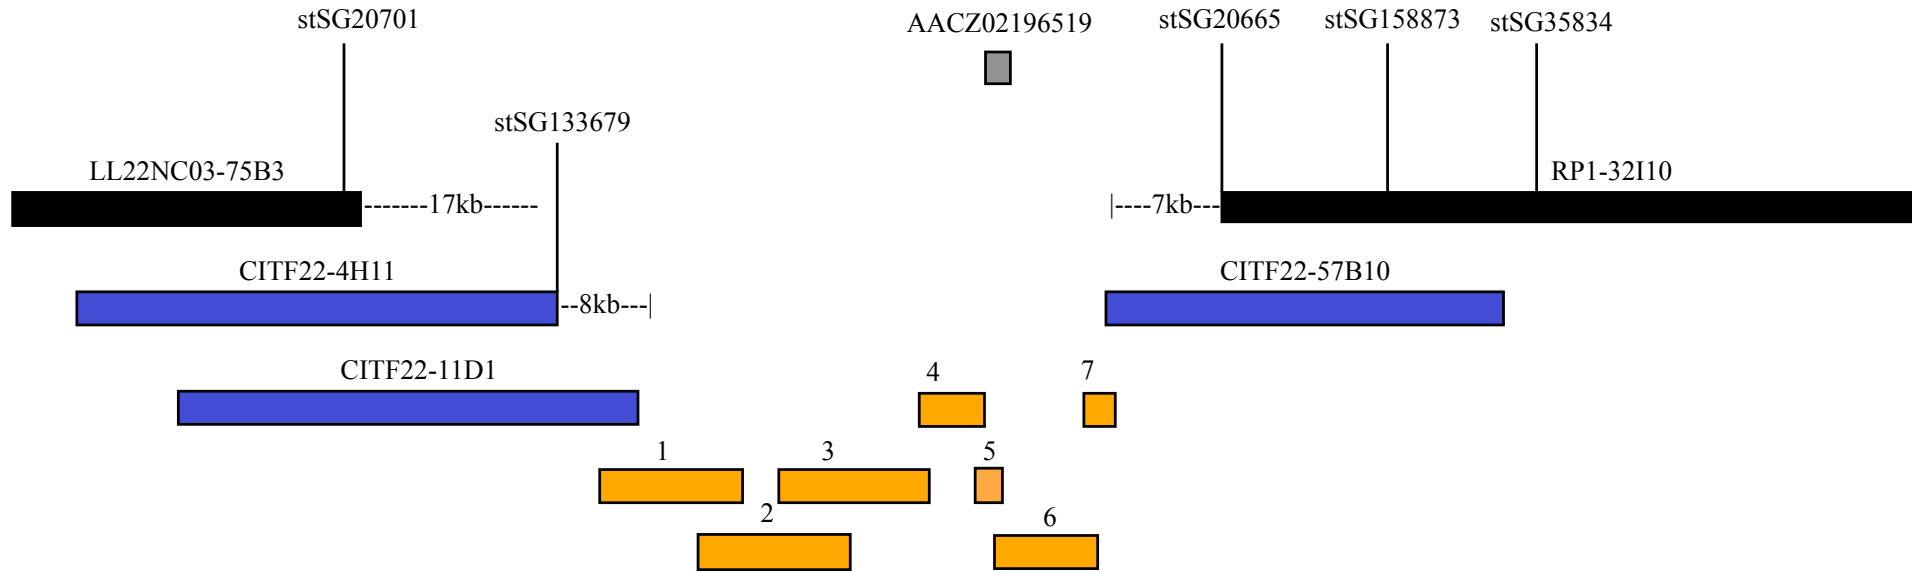

### Clones

|               |       |
|---------------|-------|
| LL22NC03-75B3 | 40 kb |
| CITF22-4H11   | 36 kb |
| CITF22-11D1   | 37 kb |
| CITF22-57B10  | 36 kb |
| RP1-32I10     | 93 kb |

### Long PCR Products

|                |        |
|----------------|--------|
| 1. c017600455L | 6.0 kb |
| 2. c455c658L   | 7.0 kb |
| 3. c009500658L | 7.0 kb |
| 4. c658c926rcL | 2.8 kb |
| 5. c926rcL     | 1.0kb  |
| 6. chimpc702L  | 4.5kb  |
| 7. c024501702  | 1.3kb  |

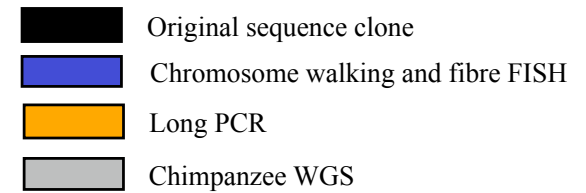

# Figure S6 - Gap 3

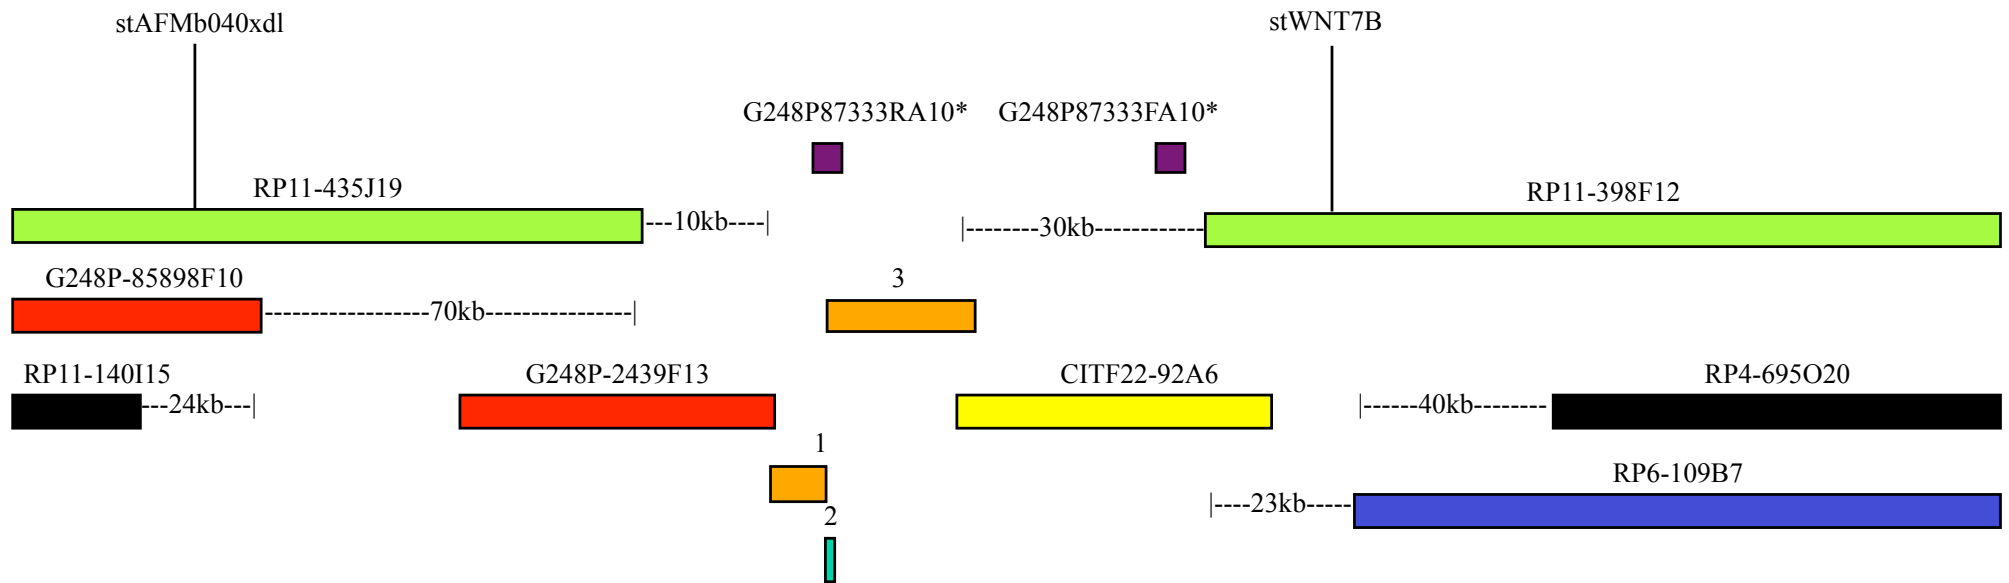

## Clones

|                |       |
|----------------|-------|
| RP11-140I15    | 172kb |
| G248P-85898F10 | 47kb  |
| RP11-435J19    | 233kb |
| G248P-2439F13  | 40kb  |
| CITF22-92A6    | 42kb  |
| RP11-398F12    | 215kb |
| RP6-109B7      | 215kb |
| RP4-695O20     | 93kb  |

## Long PCR Products

|    |                 |       |
|----|-----------------|-------|
| 1. | fw2439fw1777L   | 3kb   |
| 2. | fw2439fw177719P | 200bp |
| 3. | fw1777b19L      | 10kb  |

|  |                                           |
|--|-------------------------------------------|
|  | Original sequence clone                   |
|  | Chromosome walking and fibre FISH         |
|  | Chr22 fosmid identified by end sequence   |
|  | BAC identified by STS inside gap          |
|  | WI fosmid identified by end sequence      |
|  | Long PCR                                  |
|  | Short PCR (sequence directly)             |
|  | WI fosmid end sequence (clone not found)* |
|  | Chimpanzee WGS                            |

\* End sequences from Fosmid G248P-1777B19, but mispick/contamination problems exist with this clone.

# Figure S7 - Gap 4

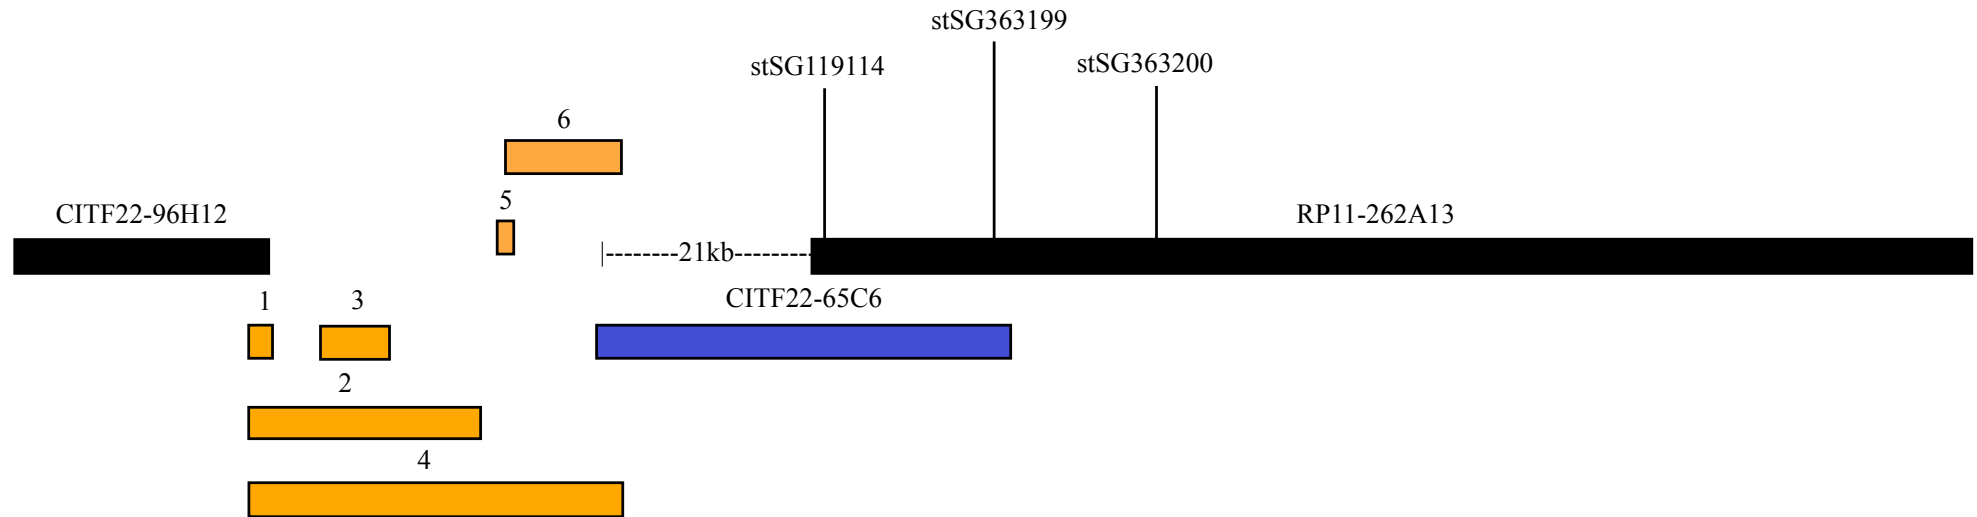

## Clones

|              |       |
|--------------|-------|
| CITF22-96H12 | 16kb  |
| CITF22-65C6  | 39kb  |
| RP11-262A13  | 128kb |

## Long PCR Products

|    |                             |                             |
|----|-----------------------------|-----------------------------|
| 1. | c010900614rc                | 1.4kb                       |
| 2. | f96s22                      | 15kb                        |
| 3. | f96s22tandemL* <sup>1</sup> | 5kb (single individual PCR) |
| 4. | f96f65* <sup>2</sup>        | 23kb+                       |
| 5. | c007400749                  | 1.0kb                       |
| 6. | c007400748                  | 7kb                         |

\*<sup>1</sup> Sequence incorporated into f96s22 accession.

\*<sup>2</sup> Only RHS of PCR sequence finished and submitted

|                                                                                       |                                   |
|---------------------------------------------------------------------------------------|-----------------------------------|
|   | Original sequence clone           |
|  | Chromosome walking and fibre FISH |
|  | Long PCR                          |

# Figure S8 - Gap 5

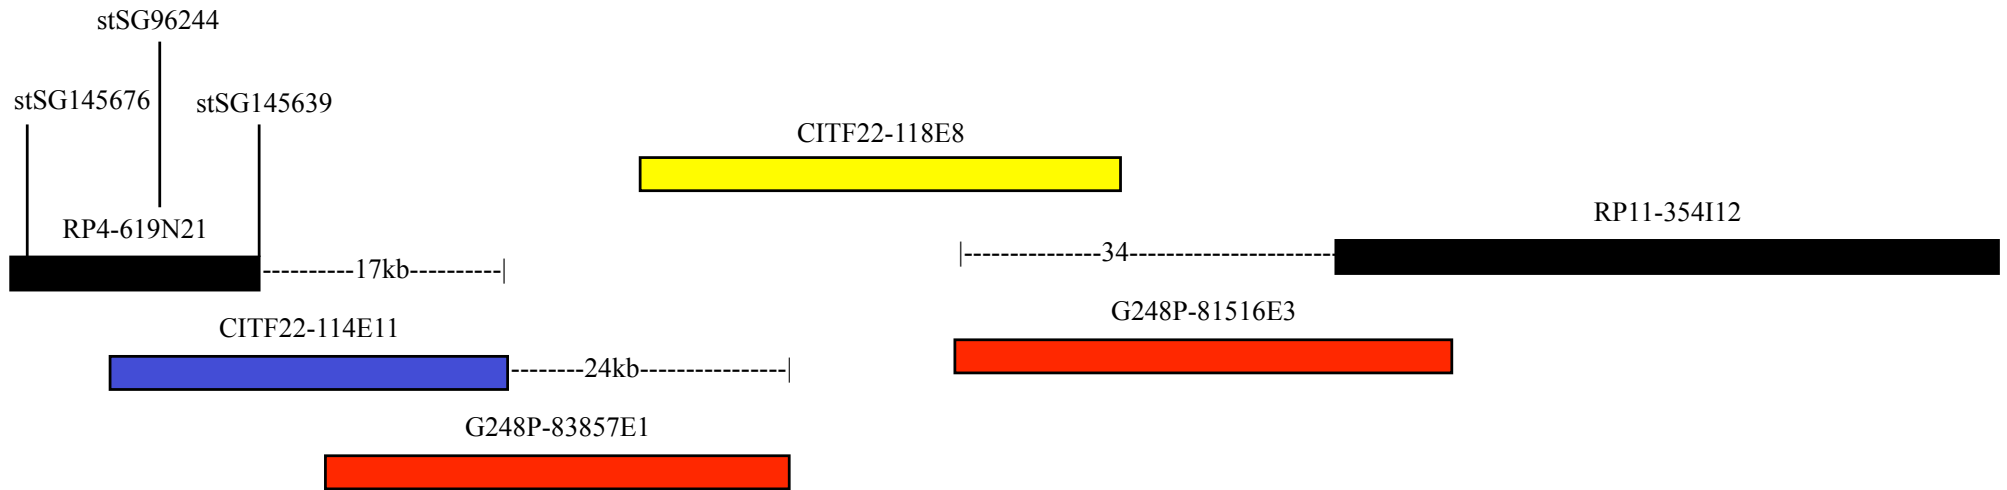

## Clones

|               |       |
|---------------|-------|
| RP4-619N21    | 139kb |
| CITF22-114E11 | 47kb  |
| G248P-83857E1 | 43kb  |
| CITF22-118E8  | 40kb  |
| G248P-81516E3 | 47kb  |
| RP11-354I12   | 88kb  |

|                                                                                       |                                         |
|---------------------------------------------------------------------------------------|-----------------------------------------|
|   | Original sequence clone                 |
|  | Chromosome walking and fibre FISH       |
|  | Chr22 fosmid identified by end sequence |
|  | WI fosmid identified by end sequence    |



# Figure S9 - Gap 6

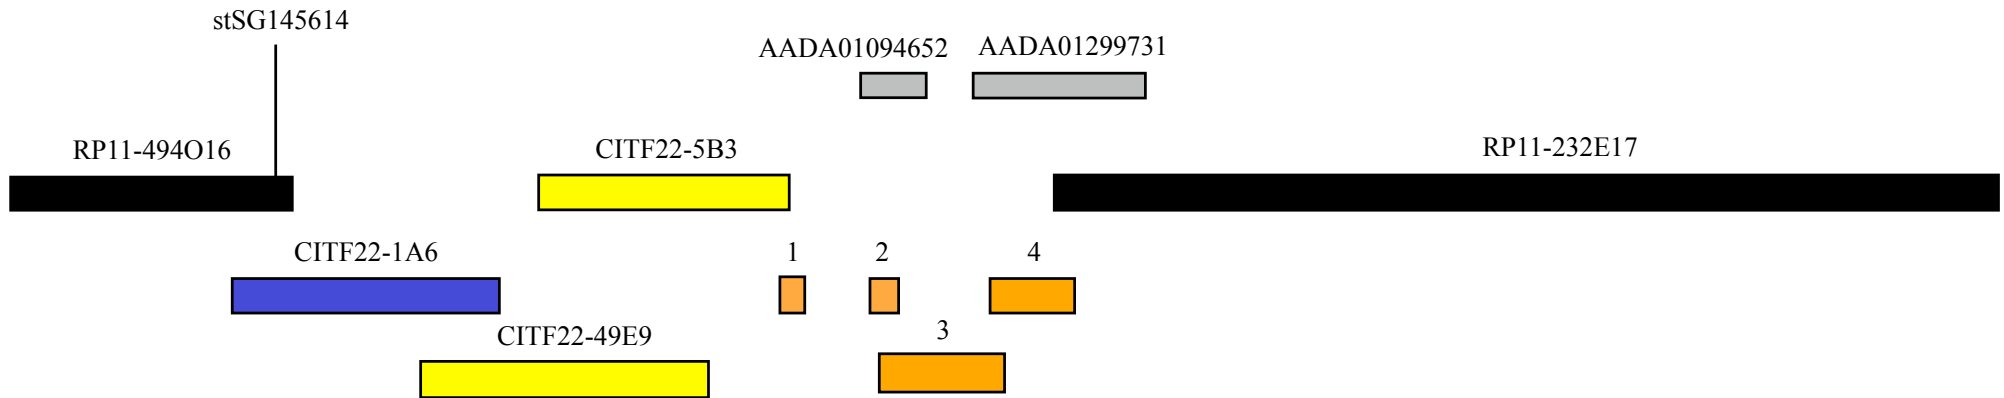

## Clones

|             |       |
|-------------|-------|
| RP11-494O16 | 51kb  |
| CITF22-1A6  | 41kb  |
| CITF22-49E9 | 46kb  |
| CITF22-5B3  | 43kb  |
| RP11-232E17 | 170kb |

## Long PCR Products

|    |              |       |
|----|--------------|-------|
| 1  | c170L        | 1.3kb |
| 2. | aada652L     | 1.7kb |
| 3. | aada652c669L | 6.0kb |
| 4. | aada731b232L | 4.2kb |

|                                                                                       |                                         |
|---------------------------------------------------------------------------------------|-----------------------------------------|
|   | Original sequence clone                 |
|  | Chromosome walking and fibre FISH       |
|  | Chr22 fosmid identified by end sequence |
|  | Long PCR                                |
|  | Chimpanzee WGS                          |

# Figure S10 - Gap 7

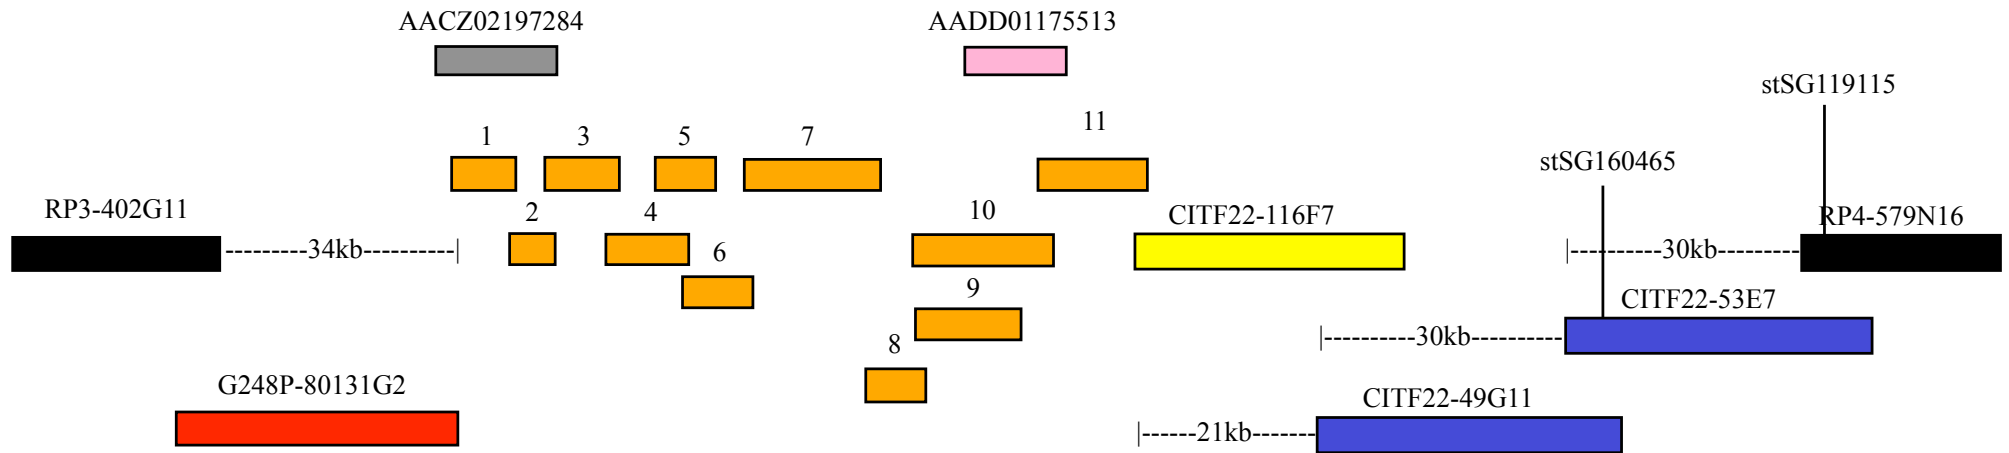

## Clones

|               |       |
|---------------|-------|
| RP3-402G11    | 177kb |
| G248P-80131G2 | 43kb  |
| CITF22-116F7  | 43kb  |
| CITF22-49G11  | 46kb  |
| CITF22-53E7   | 43kb  |
| RP4-579N16    | 67kb  |

## Long PCR Products

|     |               |       |
|-----|---------------|-------|
| 1.  | c004201334L   | 3.1kb |
| 2.  | 36887L        | 1.6kb |
| 3.  | c024601283L   | 4.4kb |
| 4.  | c283c717      | 4.8kb |
| 5.  | c018300717L   | 3.0kb |
| 6.  | c00717c00720L | 3.0kb |
| 7.  | c018300720L   | 8.4kb |
| 8.  | c720c749L     | 2.7kb |
| 9.  | c749c575_3L   | 7.0kb |
| 10. | c749aadd513L  | 9kb   |
| 11. | aadd513f116L  | 6kb   |

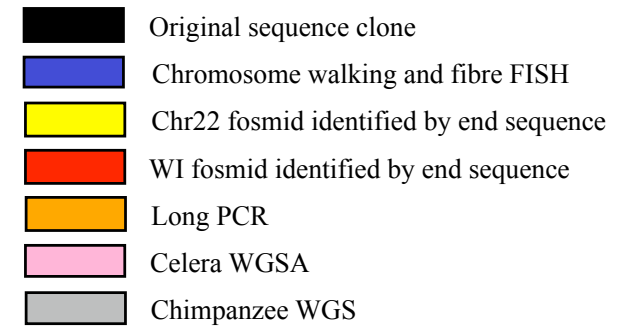

# Figure S11 - RP4-633O19 Deletion

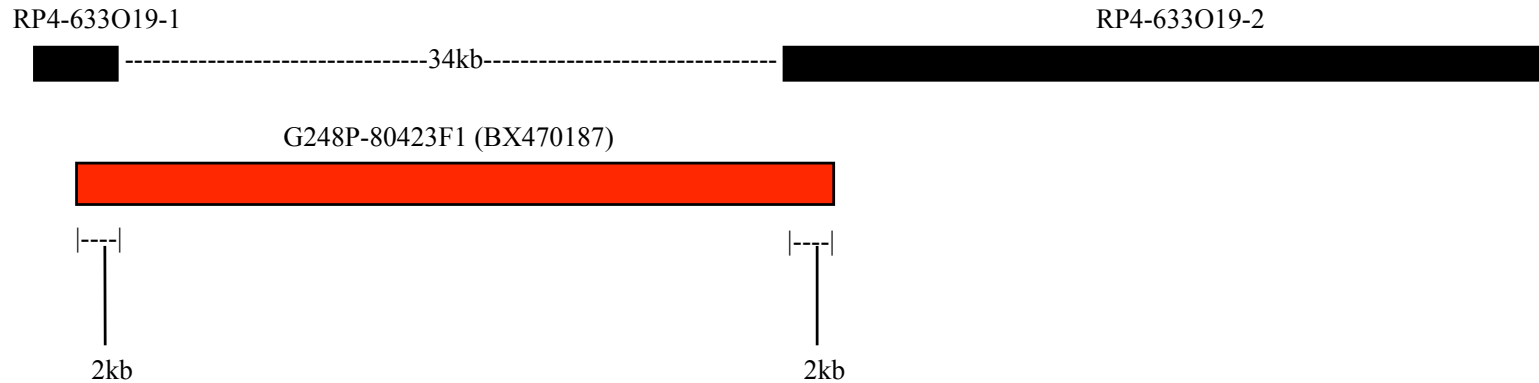

## Clones

|                     |      |
|---------------------|------|
| RP4-633O19-1        | 4kb  |
| G248P-80423F1       | 38kb |
| RP4-633O19-2        | 38kb |
| Deletion            | 34kb |
| RP4-633O19 complete | 76kb |

 Original sequence clone

 WI fosmid identified by end sequence

# Figure S12 - RP5-824I19 Deletion

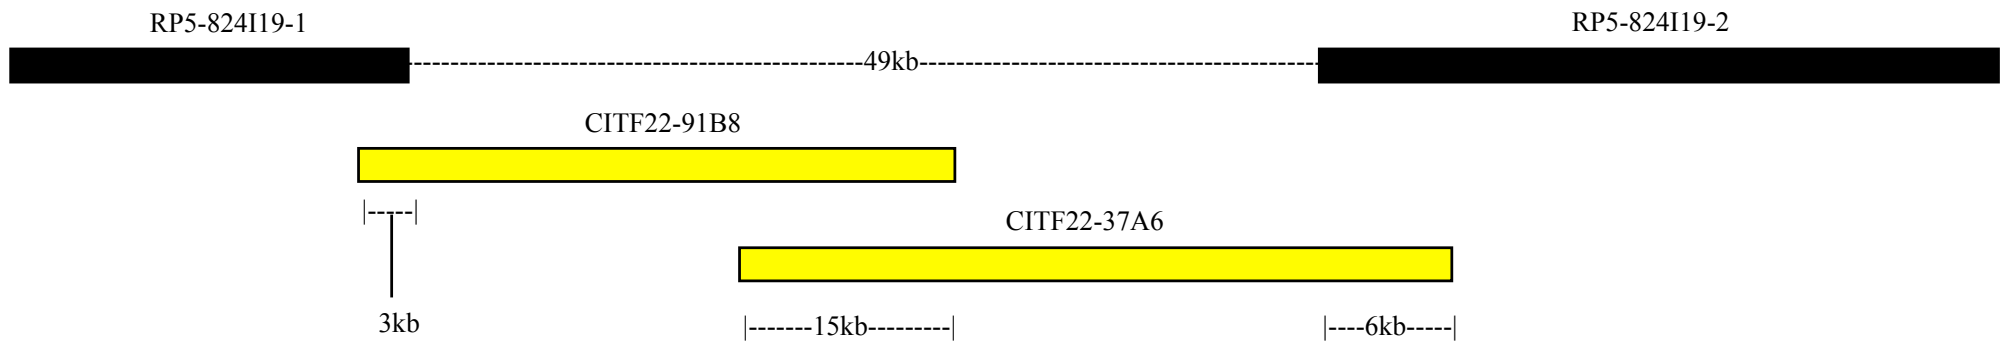

## Clones

|                     |       |
|---------------------|-------|
| RP5-824I19-1        | 25kb  |
| CITF22-91B8         | 35kb  |
| CITF22-37A6         | 38kb  |
| RP5-824I19-2        | 37kb  |
| Deletion            | 49kb  |
| RP5-824I19 complete | 111kb |

 Original sequence clone  
 Chr22 fosmid identified by end sequence

# Figure S13 - Gap A

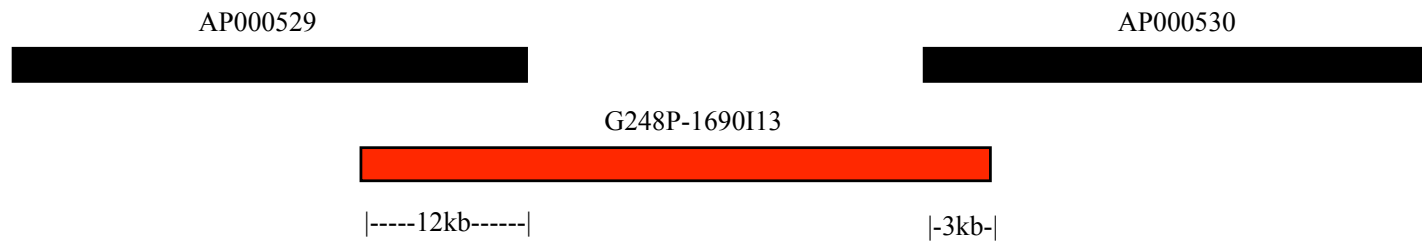

## Clones

|               |      |
|---------------|------|
| AP000529      | 38kb |
| AP000530      | 33kb |
| G248P-1690I13 | 22kb |

 Original sequence clone  
 WI fosmid identified by end sequence

# Figure S14

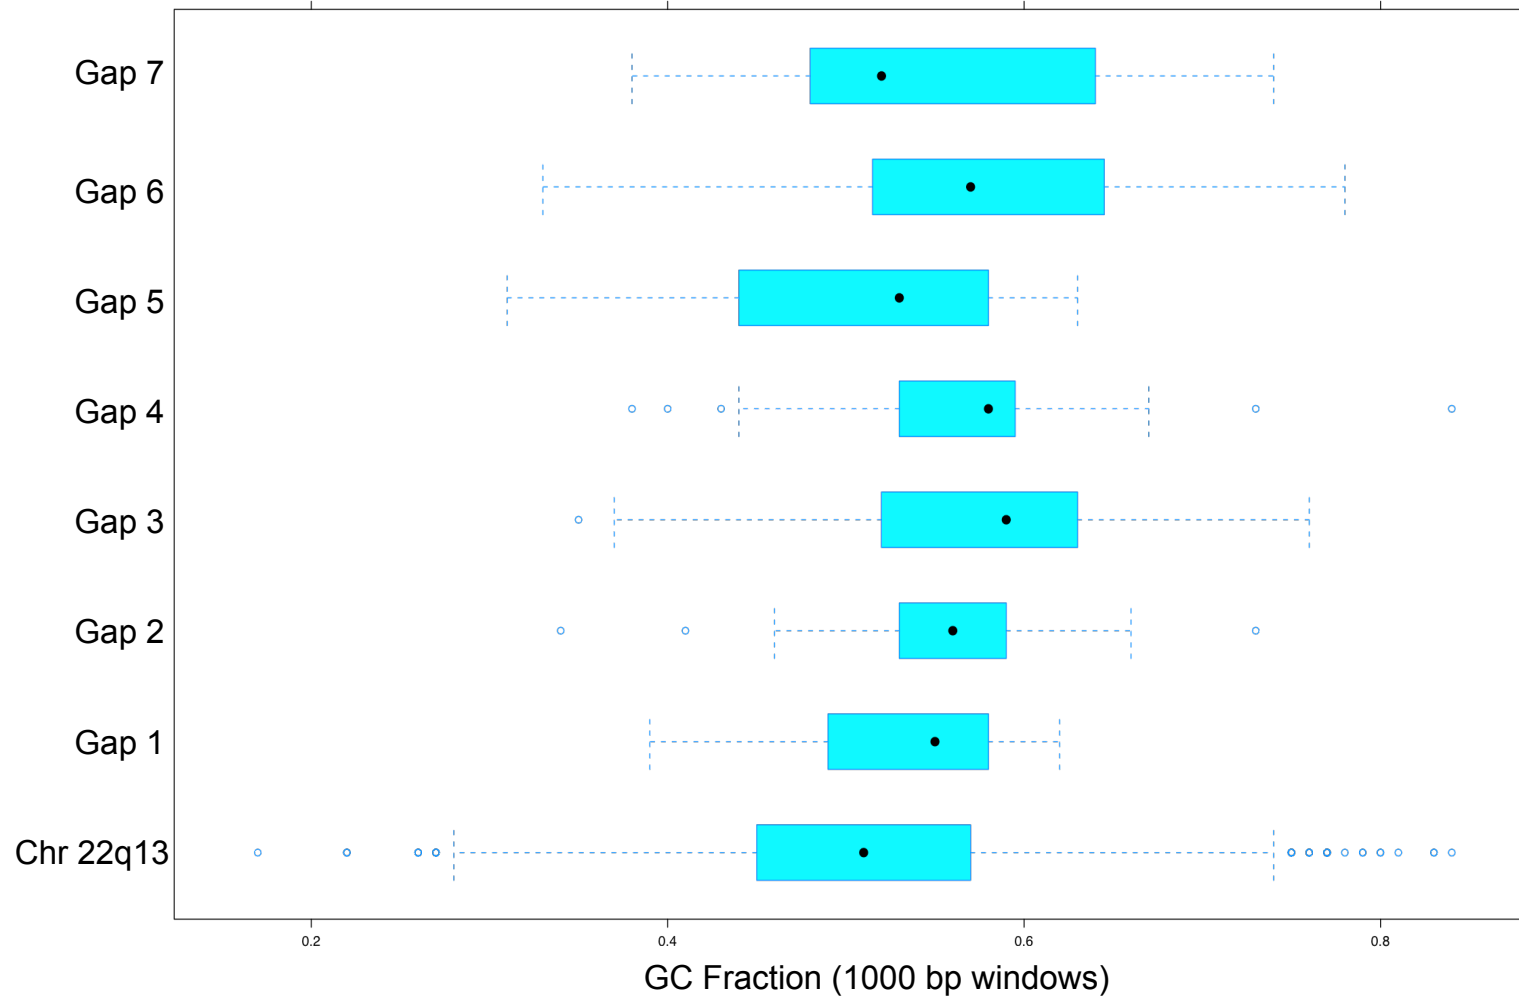

## Figure S14

Box and whisker plot analysis of GC content distributions of gaps1-7 compared to the telomeric 7.3Mb of chromosome 22 (Chr\_22). GC content of each of the gaps and the telomeric 7.3 Mb of chromosome 22 (22q13) was determined in 1 kb windows using custom perl scripts, and box and whisker plots of the distributions of GC fraction (x axis) for each gap and 22q13 created in R using bwplot and the default parameters for boxplot.stats. The dot shows the median value, and the box the 25<sup>th</sup>-75<sup>th</sup> quartile range. Whiskers are the limits of values within 1.5 times the interquartile range from the box.

# Figure S15

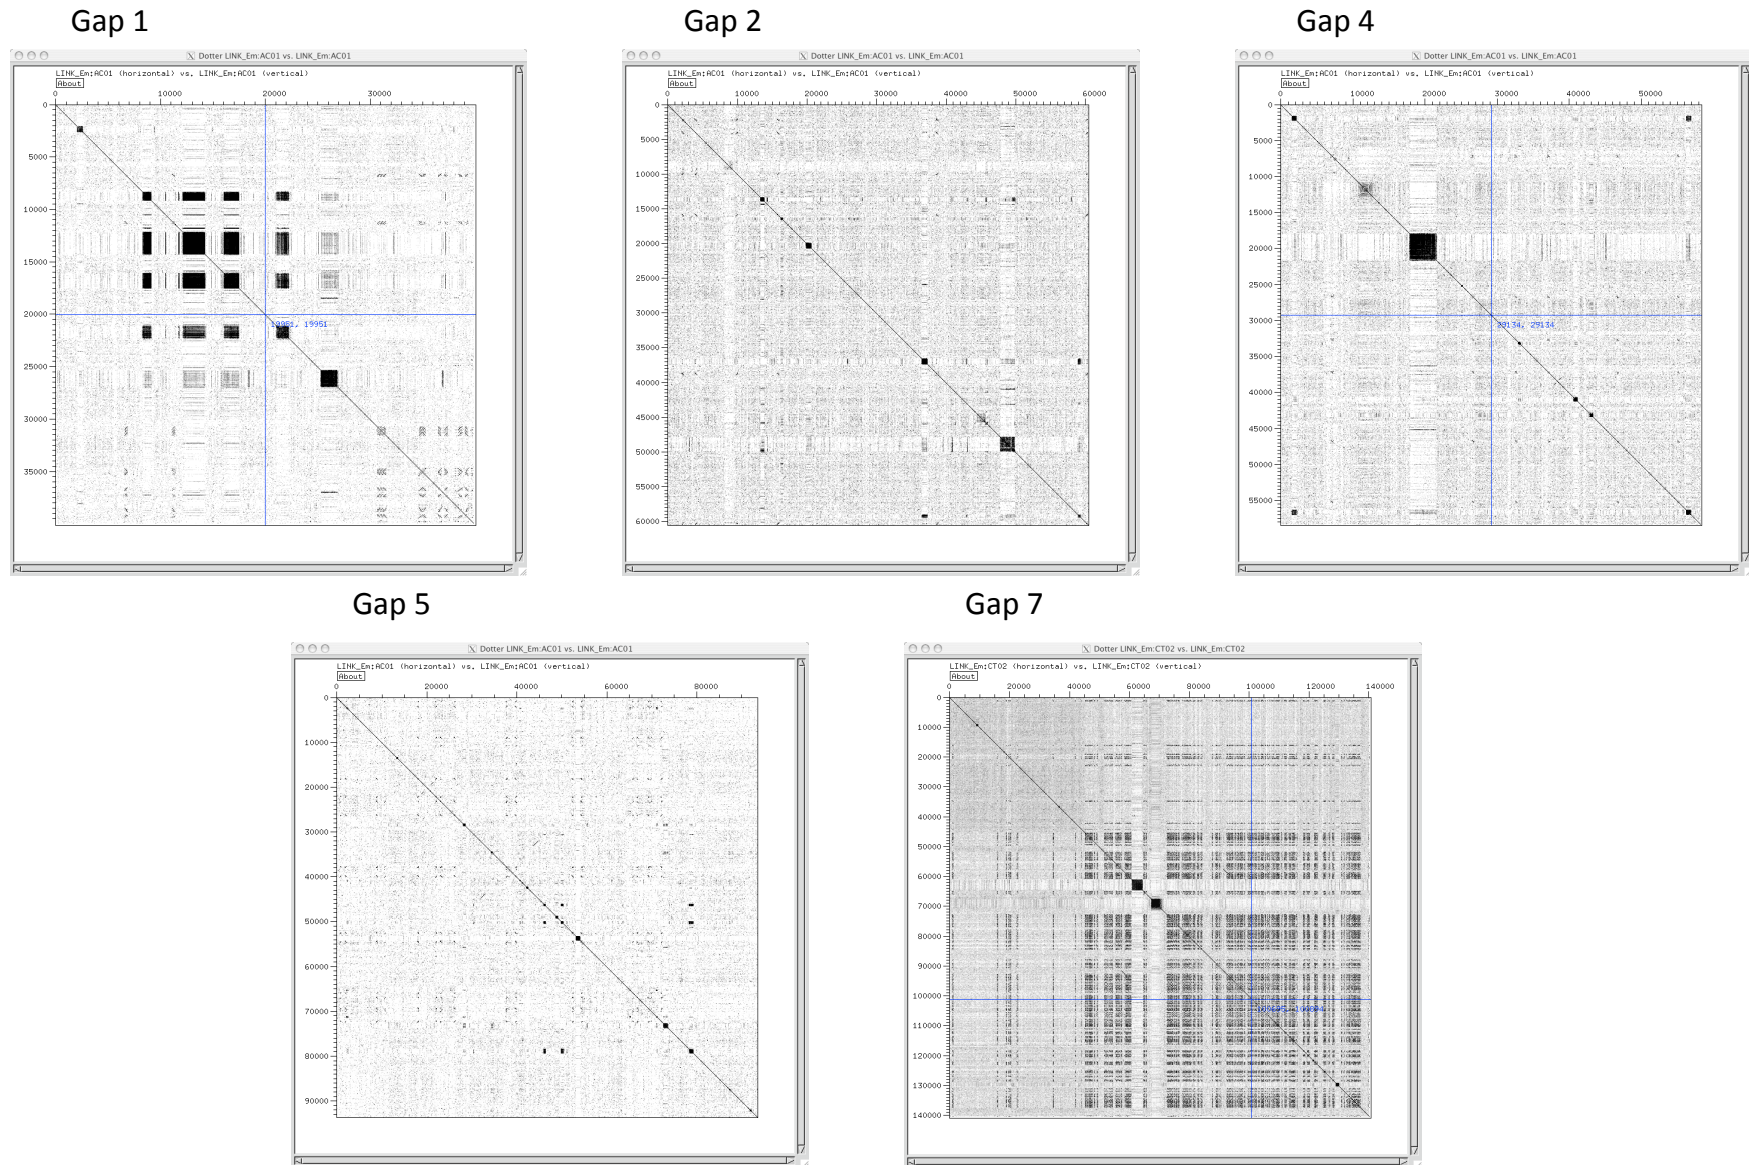

**Figure S15**  
DNA dot plot analysis of the sequences of several gap regions reveals high density of simple tandem repeat sequences, generated using Dotter with the default settings .
